# Supplementary material
Source: PubMed Central journal article supplement (PMC11335341)
Supplement: NIHMS1965520-supplement-Supplemental_Figures.pdf [file NIHMS1965520-supplement-Supplemental_Figures.pdf]

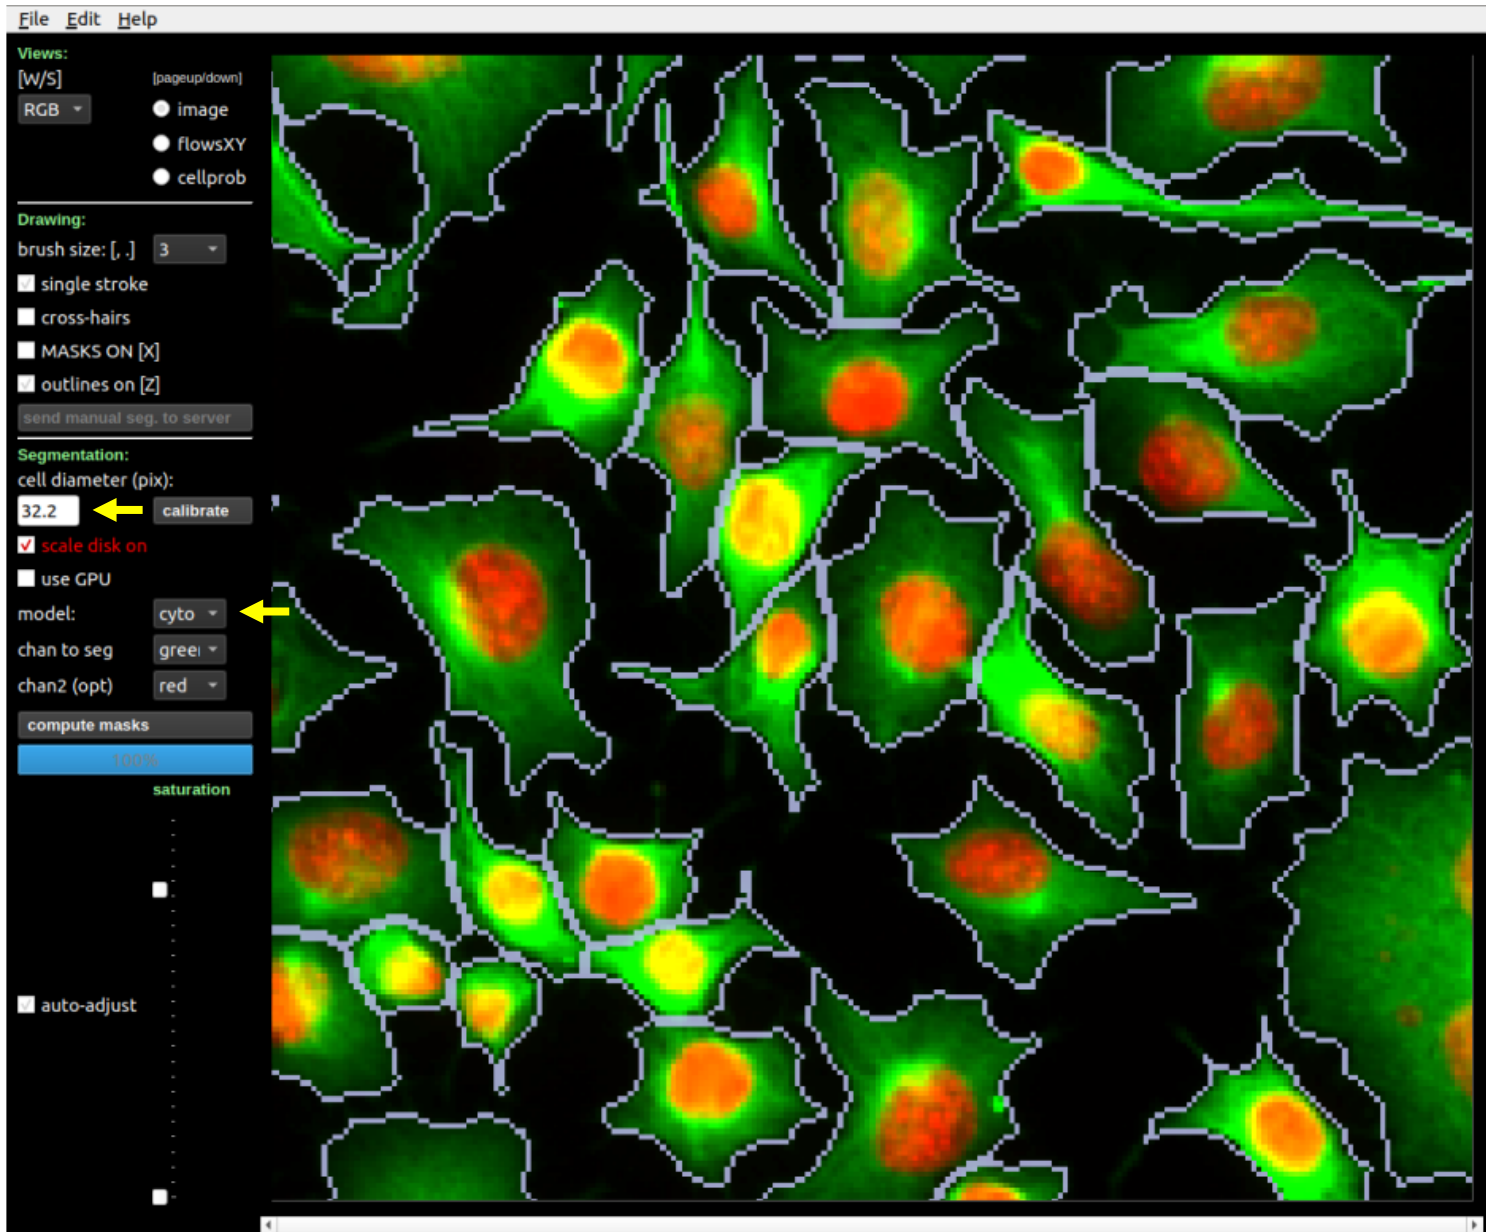

Figure S1. Screenshot of Cellpose 1.0. Yellow arrows indicate parameters to alter (cell diameter and model type), akin to Cellpose 2.0.

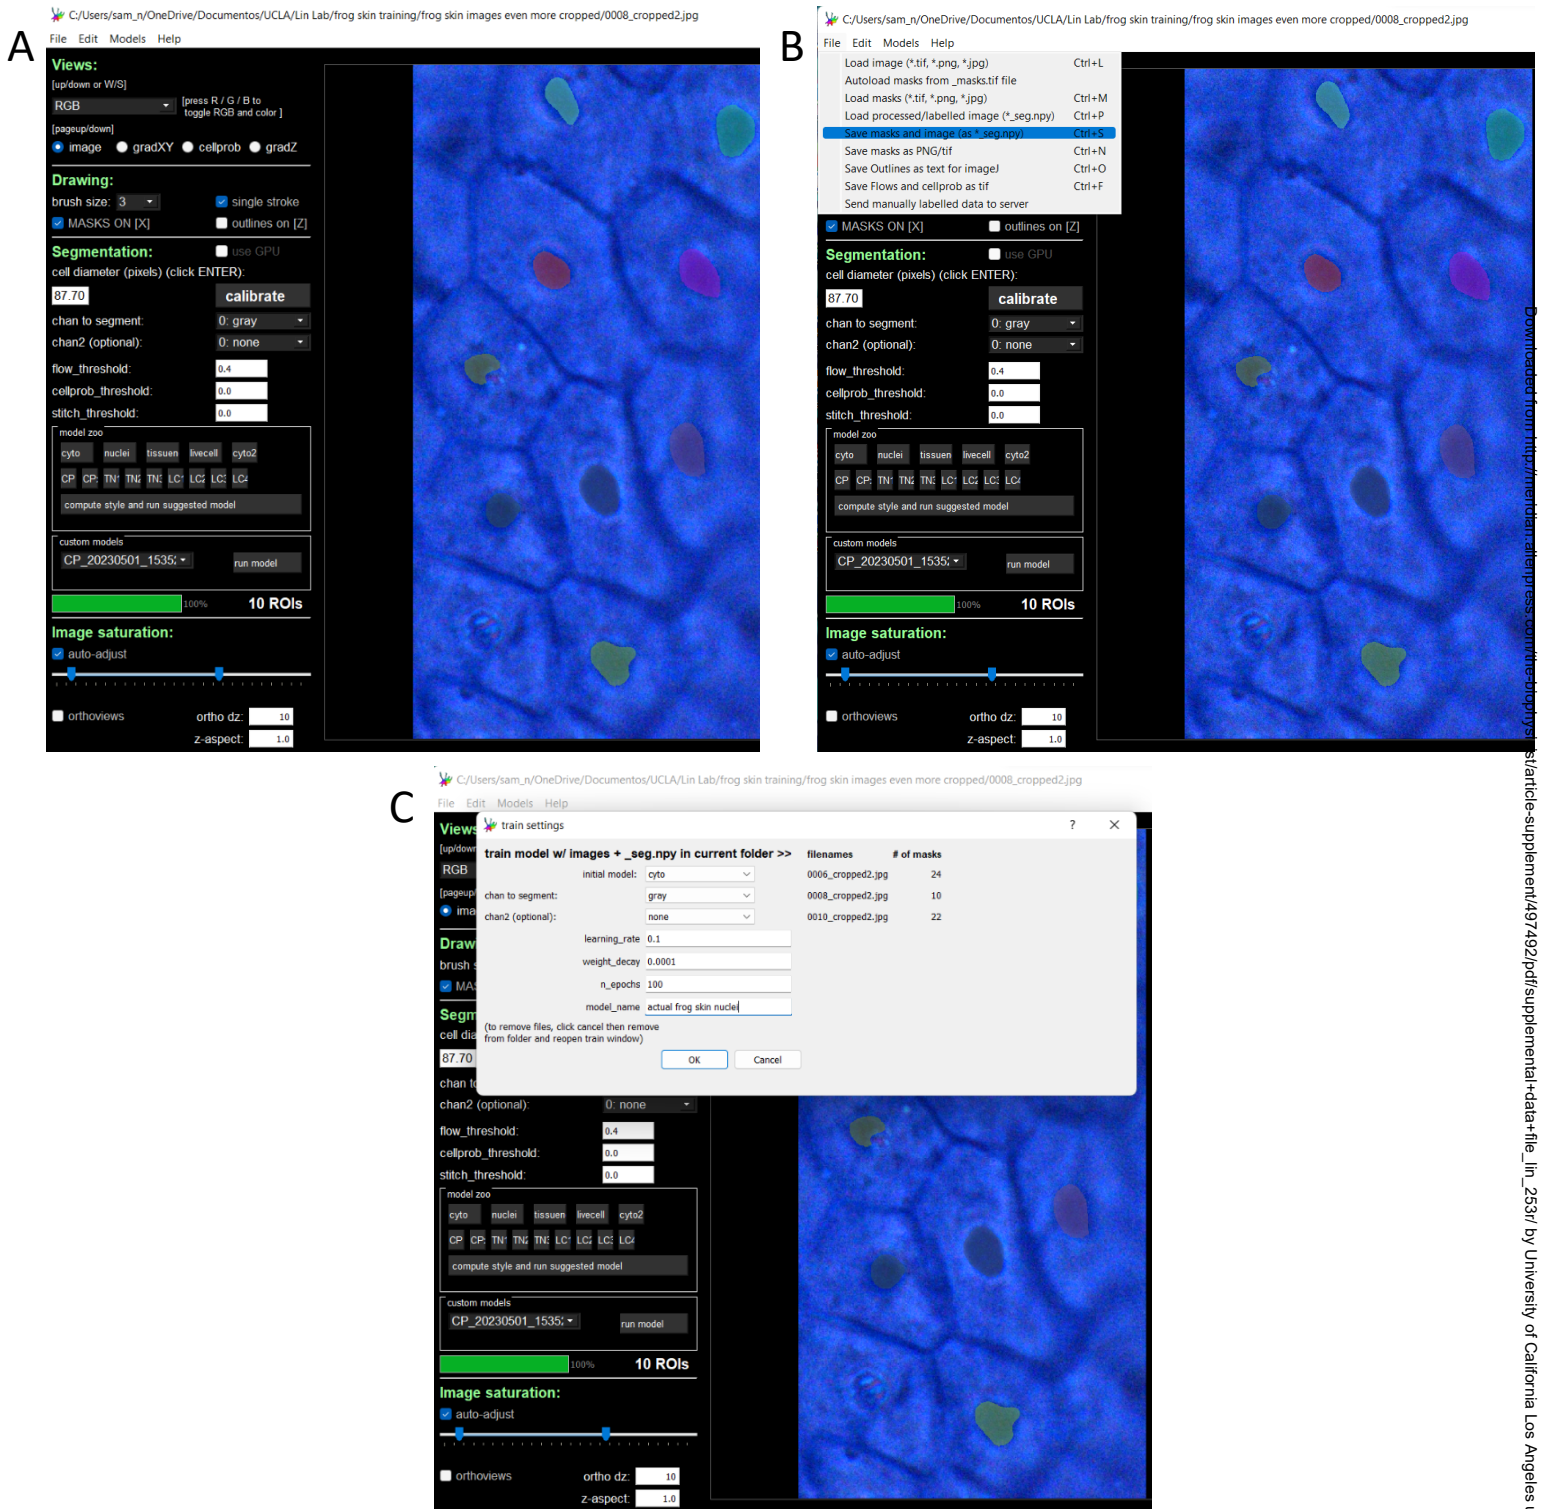

Figure S2. Training a model on Cellpose2.0. (A) Users must first manually outline the compartments of interest. In our screenshot, we demonstrate this for nuclear model training. (B) After manually outlining, the user will save the resulting segmentations under the “file” dropdown menu and select “Save masks and image (as seg.npy)”. Steps described in (A) and (B) are repeated over several iterations before proceeding to the next step. We recommend iterating this process with 3 to 5 images. (C) After the iterations described in (A) and (B) are completed, the user should then select “train new model with image + masks in folder” from the “models” dropdown menu.
